# Supplementary material for: Determination of 26 endocrine disrupting chemicals in fish and water using modified QuEChERS combined with solid-phase extraction and UHPLC-MS/MS
Source: Royal Society of Chemistry journal article supplement (doi:10.1039/c5ay01082a), 2015-01-01
Supplement: c5ay01082a1.pdf [file c5ay01082a1.pdf]

**Fig. S1** Chemical structures of target compounds.

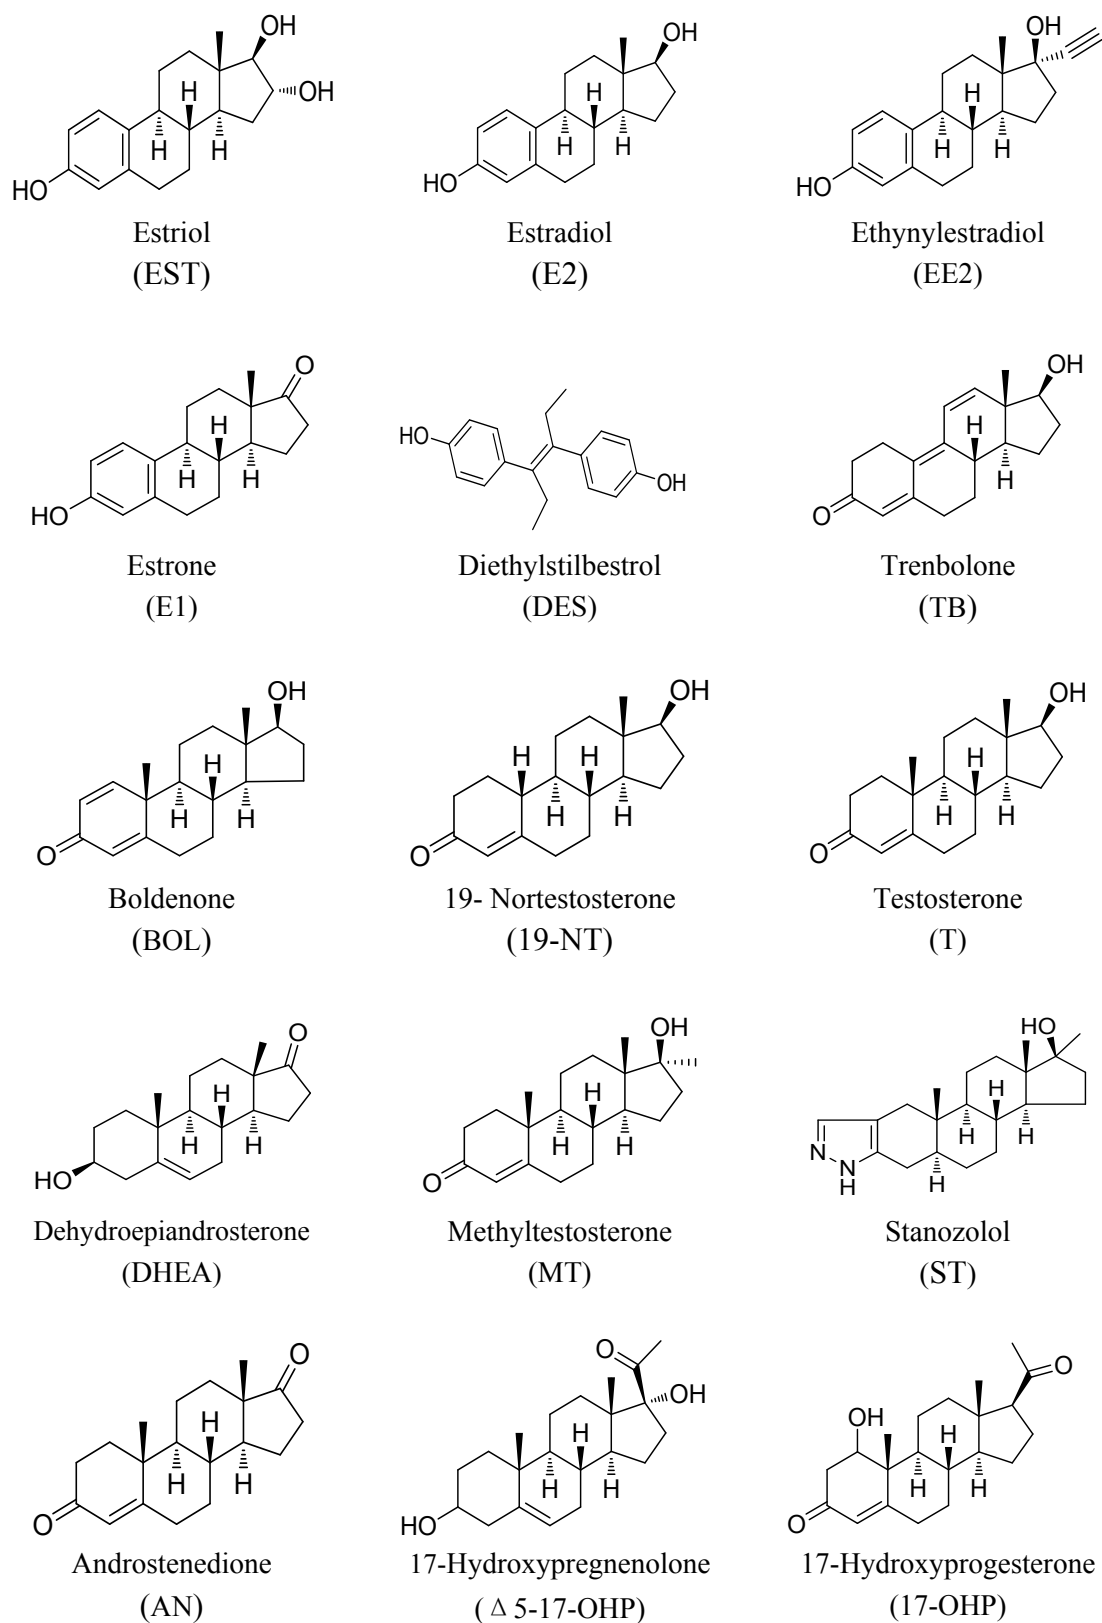

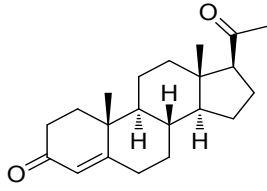

Progesterone  
(P4)

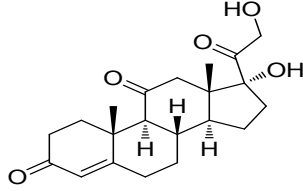

Cortisone

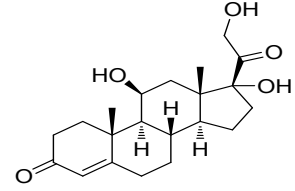

Hydrocortisone  
(Hd)

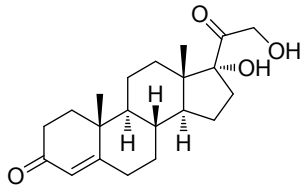

Cortisolone

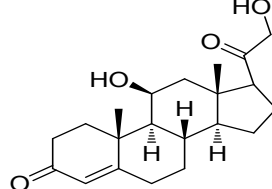

Corticosterone

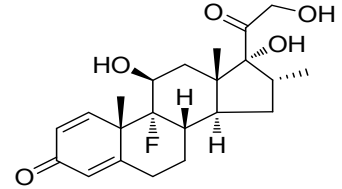

Dexamethasone  
(Dex)

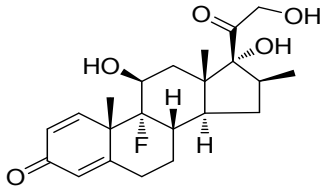

Betamethasone  
(B)

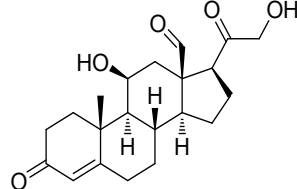

Aldosterone  
(A)

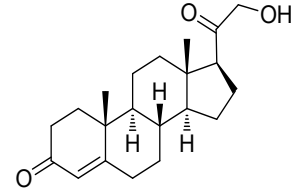

21-Hydroxyprogesterone  
(21-OHP)

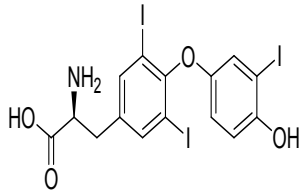

3,3,5-Triiodo-L-Thyroxine  
(T3)

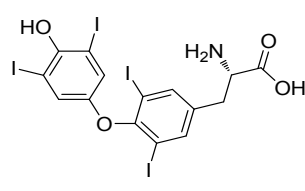

L-Thyroxine  
(T4)

**Table S1** Analytical characteristics of the determination of EDCs for milk samples ( $n = 5$ ), RSD for inter-day precision.

| Compound          | ME (%) | LDR<br>(ng/mL) | $r^2$  | LOD<br>(ng/mL) | LOQ<br>(ng/mL) | Spiked<br>(ng/mL)  | Recovery<br>(%) | RSD (%)   |
|-------------------|--------|----------------|--------|----------------|----------------|--------------------|-----------------|-----------|
| EST               | 119.2  | 1.0-100        | 0.9994 | 0.28           | 0.93           | 1.0, 5.0, 10.0     | 92.0-111.7      | 6.1-10.8  |
| EST- $d_3$        | 117.9  | 5.0-100        | 0.9988 | 0.93           | 3.11           | 1.0, 5.0, 10.0     | 95.1-97.8       | 6.3-9.5   |
| E2                | 112.4  | 20-100         | 0.9984 | 3.95           | 13.16          | 5.0, 10.0,<br>50.0 | 85.8-104.4      | 1.5-10.2  |
| E2- $d_3$         | 102.2  | 1.0-100        | 0.9955 | 0.1            | 0.5            | 1.0, 5.0, 10.0     | 86.6-101.2      | 3.8-7.2   |
| EE2               | 109.1  | 20-200         | 0.9961 | 4.44           | 14.79          | 5.0, 10.0,<br>50.0 | 88.3-119.2      | 2.8-7.9   |
| E1                | 117.2  | 10-100         | 0.9996 | 1.81           | 6.02           | 2.0, 5.0, 10       | 74.9 -103.9     | 6.5 -9.0  |
| DES               | 74.0   | 5.0-100        | 0.9987 | 0.76           | 2.52           | 1.0, 5.0, 10.0     | 82.4-101.6      | 4.9-8.3   |
| TB                | 84.9   | 5.0-100        | 0.9994 | 0.75           | 2.51           | 1.0, 5.0, 10.0     | 73.0-89.3       | 3.5-8.9   |
| BOL               | 91.3   | 1.0-100        | 0.9995 | 0.07           | 0.23           | 1.0, 5.0, 10.0     | 73.0-90.0       | 2.2-8.9   |
| 19-NT             | 84.5   | 5.0-100        | 0.9998 | 0.44           | 1.46           | 1.0, 5.0, 10.0     | 73.6-113.9      | 8.1-11.7  |
| T                 | 89.7   | 1.0-100        | 0.9998 | 0.22           | 0.73           | 1.0, 5.0, 10.0     | 82.2-90.8       | 7.5-12.7  |
| DHEA              | 94.5   | 5.0-100        | 0.9946 | 0.66           | 2.21           | 1.0, 5.0, 10.0     | 85.9- 97.7      | 12.3-15.0 |
| MT                | 83.0   | 5.0-100        | 0.9994 | 0.41           | 1.37           | 1.0, 5.0, 10.0     | 78.5-91.5       | 2.4-9.8   |
| ST                | 87.6   | 1.0-100        | 0.9924 | 0.07           | 0.24           | 1.0, 5.0, 10.0     | 86.6-113.9      | 5.7-11.6  |
| ST- $d_3$         | 80.3   | 5.0-100        | 0.9971 | 0.58           | 1.95           | 1.0, 5.0, 10.0     | 71.1-89.2       | 2.2-7.4   |
| AN                | 81.2   | 1.0-100        | 0.9964 | 0.29           | 0.98           | 1.0, 5.0, 10.0     | 102.5-120.3     | 6.1-14.2  |
| $\Delta$ 5-17-OHP | 117.5  | 1.0-100        | 0.9998 | 0.14           | 0.47           | 1.0, 5.0, 10.0     | 81.0-95.0       | 7.1-12.0  |
| 17-OHP            | 119.5  | 1.0-100        | 0.9984 | 0.04           | 0.13           | 1.0, 5.0, 10.0     | 76.1-89.3       | 6.6-7.2   |
| P4- $d_9$         | 81.2   | 1.0-100        | 0.9999 | 0.11           | 0.38           | 1.0, 5.0, 10.0     | 110.2-118.5     | 3.5-5.1   |
| P4                | 120.6  | 5.0-100        | 0.9936 | 0.34           | 1.13           | 1.0, 5.0, 10.0     | 114.6-120.5     | 2.5-4.2   |
| Cortisone         | 80.9   | 5.0-100        | 0.9964 | 0.38           | 1.27           | 1.0, 5.0, 10.0     | 88.2-109.7      | 2.3-10.1  |

|                    |       |         |        |      |      |                |            |           |
|--------------------|-------|---------|--------|------|------|----------------|------------|-----------|
| Hd                 | 111.7 | 5.0-100 | 0.9947 | 1.48 | 4.93 | 1.0, 5.0, 10.0 | 96.5-107.4 | 3.6-14.3  |
| Cortexolone        | 84.6  | 1.0-100 | 0.9971 | 0.16 | 0.53 | 1.0, 5.0, 10.0 | 79.9-99.0  | 4.3- 10.0 |
| Corticostero<br>ne | 83.1  | 5.0-100 | 0.9993 | 1.50 | 5.00 | 1.0, 5.0, 10.0 | 74.9-101.4 | 4.3-10.8  |
| Dex                | 83.1  | 1.0-100 | 0.9965 | 0.27 | 0.89 | 1.0, 5.0, 10.0 | 69.1-104.6 | 3.2-9.7   |
| B                  | 86.7  | 1.0-100 | 0.9947 | 0.26 | 0.86 | 1.0, 5.0, 10.0 | 82.9-118.4 | 9.3-13.2  |
| A                  | 71.5  | 1.0-100 | 0.9946 | 0.15 | 0.50 | 1.0, 5.0, 10.0 | 79.4-96.5  | 2.7-10.3  |
| 21-OHP             | 86.5  | 1.0-100 | 0.9955 | 0.18 | 0.60 | 1.0, 5.0, 10.0 | 89.3-103.5 | 3.2-10.1  |
| T3                 | 110.1 | 1.0-100 | 0.9979 | 0.15 | 0.50 | 1.0, 5.0, 10.0 | 87.7-93.1  | 3.9-7.4   |
| T4                 | 110.6 | 5.0-100 | 0.9963 | 0.46 | 1.52 | 1.0, 5.0, 10.0 | 65.8-90.2  | 5.3-8.9   |
